# Supplementary material for: Dietary intake and weight status of urban Thai preadolescents in the context of food environment
Source: PubMed Central journal article supplement — Prev Med Rep. 2017 Sep 28;8:153–7. doi: 10.1016/j.pmedr.2017.09.009 (PMC5986972; doi:10.1016/j.pmedr.2017.09.009), 2017-09-28
Supplement: mmc1.pdf [file mmc1.pdf]

## Supplementary 1 Food group classification system

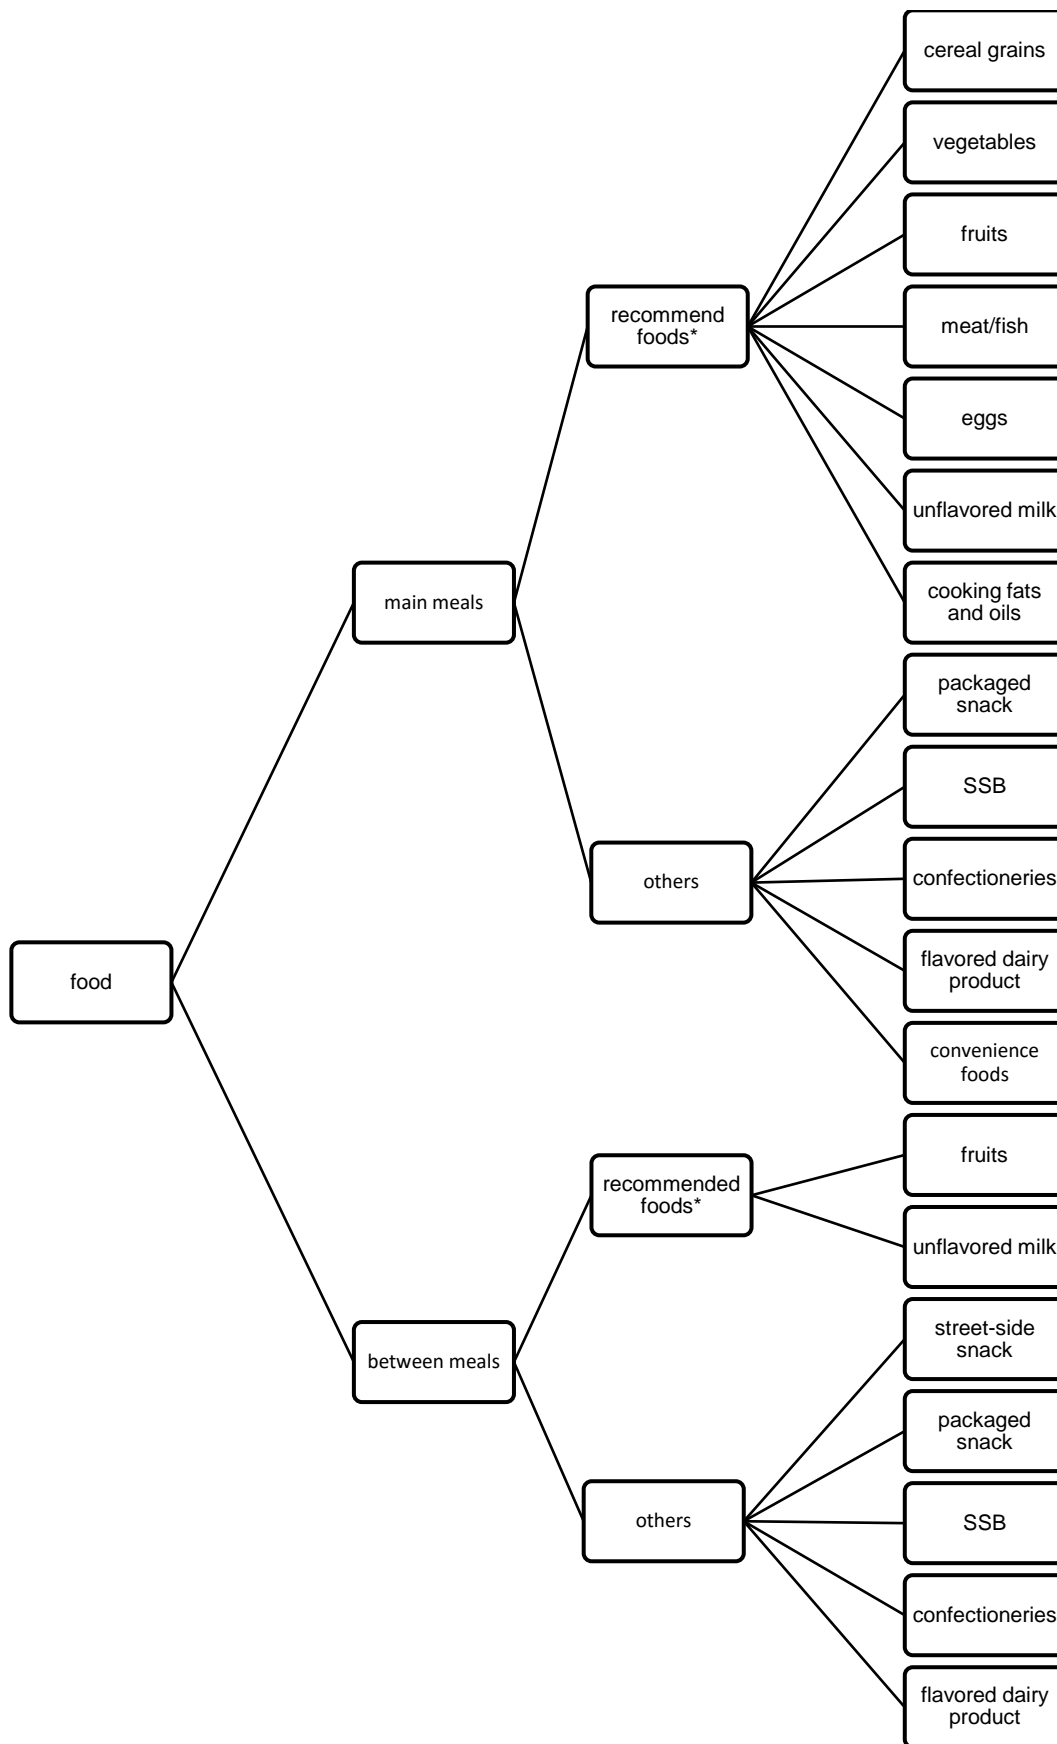

\* Foods included in Thailand's food-based dietary guidelines

## Supplementary 2 Description of food group

| Categories                             | Types of foods                                                                                                                                    | Food items                                                                                                                                                                                                                                                                                                              |
|----------------------------------------|---------------------------------------------------------------------------------------------------------------------------------------------------|-------------------------------------------------------------------------------------------------------------------------------------------------------------------------------------------------------------------------------------------------------------------------------------------------------------------------|
| <b>Cereal grains</b>                   | Common staple foods, including refined/whole grain rice, bread, and noodles                                                                       | steam rice, steamed sticky rice, plain bread, rice noodles, wheat noodles, pasta, fermented noodles, vermicelli, corn                                                                                                                                                                                                   |
| <b>Vegetables</b>                      | All vegetables, including leafy, nonleafy, and starchy vegetables; beans and legumes; all kinds of mushrooms; and seaweeds                        | tomato, green papaya, morning glory, basil, lettuce, carrot, cabbage, chili, garlic, eggplant, pumpkin, cucumber, potato, mushroom, bamboo shoot, long bean                                                                                                                                                             |
| <b>Fruits</b>                          | All fruits, including ripe and unripe and fresh or dried fruits                                                                                   | mango, orange, banana, apple, durian, guava, watermelon, pineapple, grape                                                                                                                                                                                                                                               |
| <b>Meat/fish</b>                       | Raw or processed meat, poultry, chicken, fish, seafood, and their organs                                                                          | meat/poultry/chicken/fish, season, organ meat, meat balls, fish balls, sausages, bacon,                                                                                                                                                                                                                                 |
| <b>Eggs</b>                            | All kinds of animal eggs                                                                                                                          | chicken eggs, duck eggs, quail eggs                                                                                                                                                                                                                                                                                     |
| <b>Unflavored milk</b>                 | Plain full- or reduced-fat milk or other dairy products                                                                                           | plain milk, plain skimmed milk                                                                                                                                                                                                                                                                                          |
| <b>Cooking fats and oils</b>           | Fats and oils from plants and animals, including salad dressing, mayonnaise, oils, and coconut milk                                               | mayonnaise, coconut milk, butter, margarine, palm oil, soybean oil, rice bran oil                                                                                                                                                                                                                                       |
| <b>Packaged snacks</b>                 | Commercially and industrially packaged savory snack                                                                                               | potato chip, corn chips, flavored fried seaweeds, flavored fish snack                                                                                                                                                                                                                                                   |
| <b>Sugar-sweetened beverages (SSB)</b> | All beverages with added sugar, including artificially sweetened beverages                                                                        | soda drinks and non-100% fruit juices, soft drink, sweetened tea                                                                                                                                                                                                                                                        |
| <b>Confectioneries</b>                 | Flour-, sugar-, and chocolate-based confections and Thai traditional dessert                                                                      | cookies, cakes, candies, chocolate, donuts, bun, chewing gum, sherbet, traditional dessert                                                                                                                                                                                                                              |
| <b>Flavored milk</b>                   | Sweetened or flavored dairy products                                                                                                              | soy milk, dairy snack, dairy based ice-cream, flavored yoghurt                                                                                                                                                                                                                                                          |
| <b>Convenience foods</b>               | Industrially ready-to-eat foods                                                                                                                   | instant noodles, ready-to-eat porridge, canned products, breakfast cereals                                                                                                                                                                                                                                              |
| <b>Street-side snacks</b>              | Light meals or snacks mostly sold by street-side vendors or road side shops, including traditional fast food, local dishes, and Western fast food | Thai fried chicken, grill chicken, nuggets, fried sausage, grilled sausage, hot dog, instant noodle spicy salad, French fried, fried rice, steamed Chinese chive cake, rice noodle soup, meatballs, crispy wontons, spicy minced pork salad (Larb), Basil pork (Ka prao), Thai pancake(Kanom Tokyo), Green papaya salad |
